# Supplementary material for: Substrate-independent, Schiff base interactions to fabricate lysine-functionalized surfaces with fibrinolytic activity
Source: Royal Society of Chemistry journal article supplement (doi:10.1039/c5tb02605a), 2016-01-01
Supplement: c5tb02605a1.pdf [file c5tb02605a1.pdf]

### Electronic Supplementary Information (ESI)

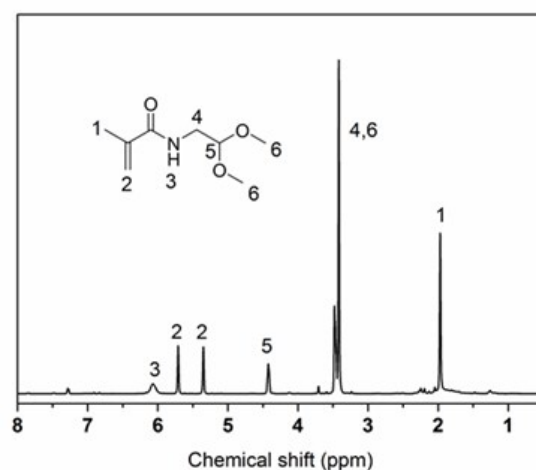

**Figure S1.**  $^1\text{H}$  NMR spectrum of DMEA in  $\text{CDCl}_3$ .

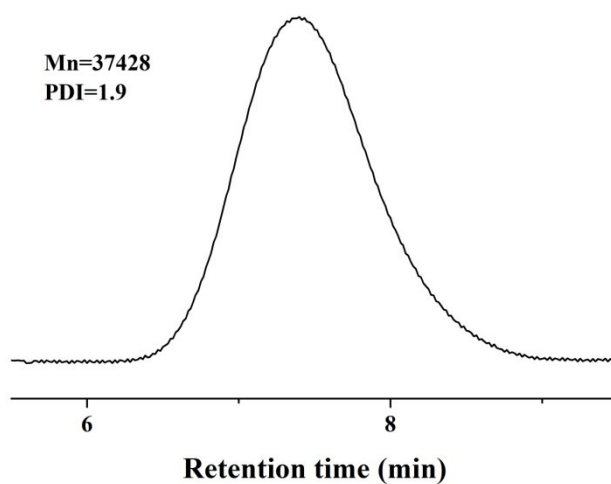

**Figure S2.** APDMEA spectrum of GPC

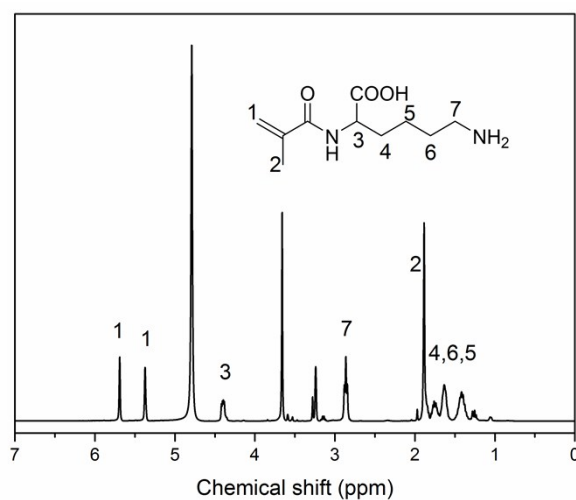

**Figure S3.**  $^1\text{H}$  NMR spectrum of MLys in  $\text{D}_2\text{O}$ .

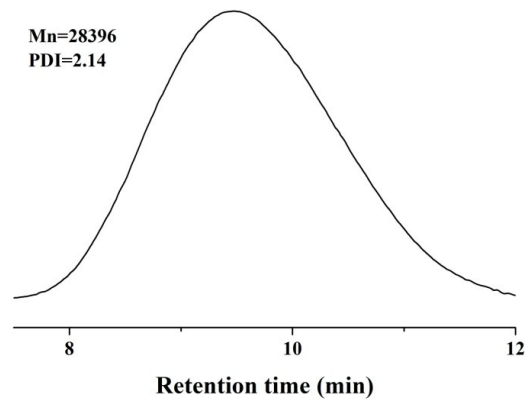

Figure S4. APMlys spectrum of GPC.

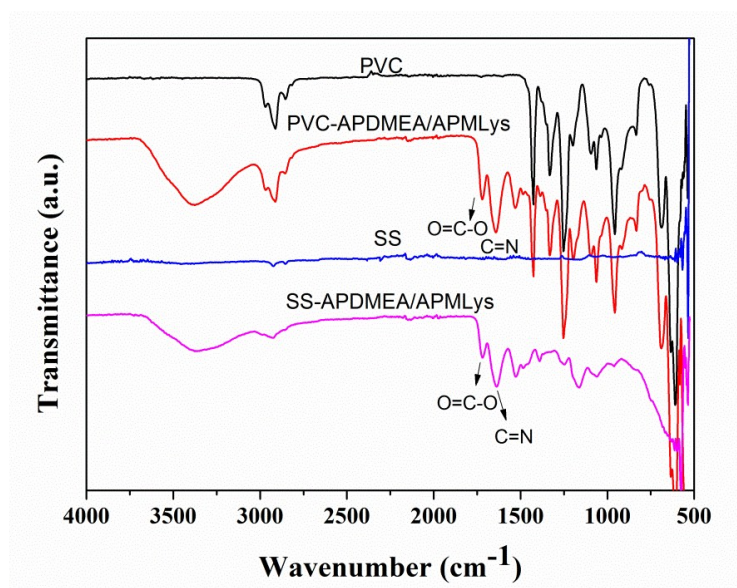

Figure S5. ATR-FTIR spectra of PVC, PVC-APDMEA/APMlys, SS and SS-APDMEA/APMlys.

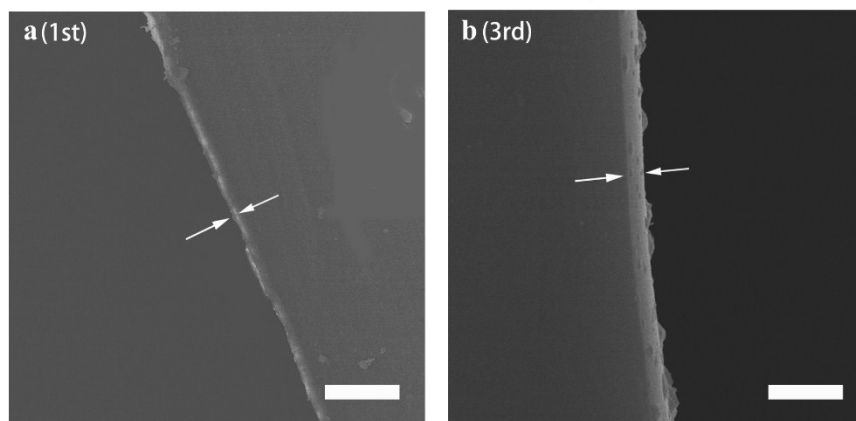

Figure S6. SEM images of modified PDMS for (a) one cycle and (b) three cycles. The scale bar represents  $2.0 \mu\text{m}$ .

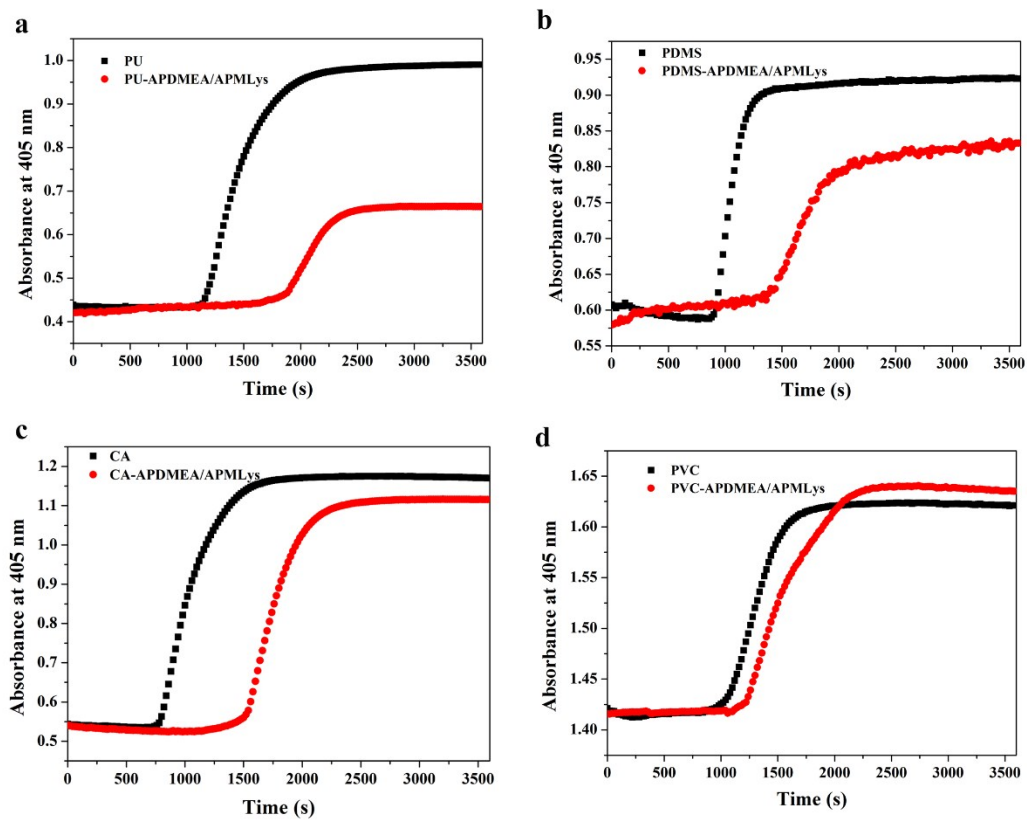

Figure S7. Re-calcification time of different substrates.

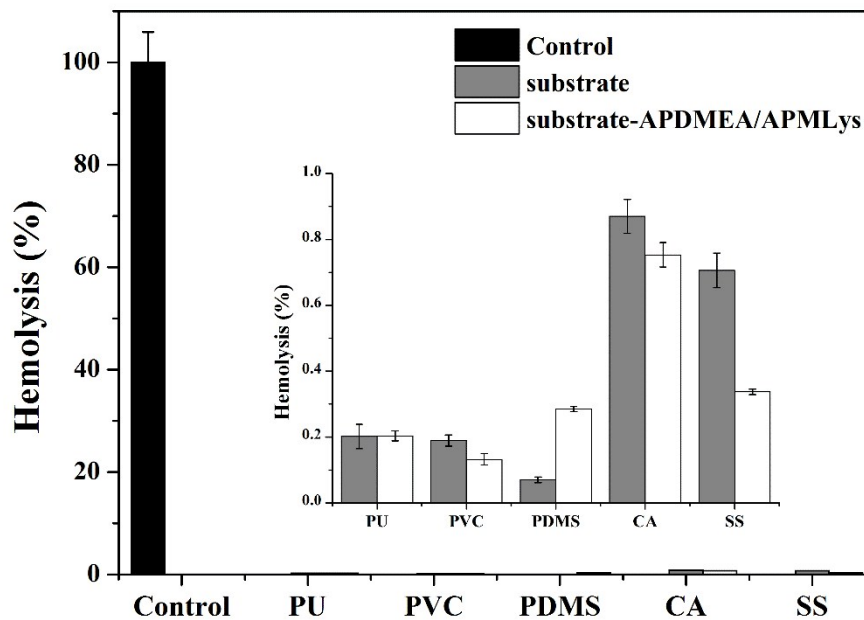

Figure S8. Hemolysis degree of different substrates. The data are presented as the means  $\pm$  SD, n = 6.

**Table S1.** Surface analysis results of CA, PU, PDMS, SS and PU samples

| sample                       | XPS atomic concentration (%) |       |       |       |       |      |
|------------------------------|------------------------------|-------|-------|-------|-------|------|
|                              | [C]                          | [N]   | [O]   | [Si]  | [Cl]  | [Fe] |
| CA                           | 56.57                        |       | 43.43 |       |       |      |
| CA-APDMEA/APMLys             | 68.34                        | 9.66  | 22    |       |       |      |
| PU                           | 71.96                        | 3.12  | 24.92 |       |       |      |
| PU-APDMEA/APMLys             | 69.23                        | 7.32  | 23.45 |       |       |      |
| PDMS                         | 45.38                        |       | 28.24 | 25.93 |       |      |
| PDMS-APDMEA/APMLys           | 51.48                        | 2.60  | 23.94 | 21.98 |       |      |
| PDMS-APDMEA/ APMLys (PBS)    | 54.77                        | 3.13  | 25.43 | 16.67 |       |      |
| PDMS-APDMEA/ APMLys (Plasma) | 52.55                        | 2.31  | 24.50 | 20.64 |       |      |
| SS                           | 60.41                        | 2.34  | 35.33 |       |       | 1.91 |
| SS-APDMEA/APMLys             | 69.08                        | 10.07 | 20.85 |       |       |      |
| SS-APDMEA/APMLys (PBS)       | 68.48                        | 9.47  | 22.05 |       |       |      |
| SS-APDMEA/APMLys (Plasma)    | 68.18                        | 9.65  | 22.17 |       |       |      |
| PVC                          | 67.37                        |       | 12.47 |       | 20.16 |      |
| PVC-APDMEA/ APMLys           | 67.81                        | 3.59  | 10.99 |       | 17.61 |      |
